# Supplementary material
Source: publisher site journal article supplement (https://www.dovepress.com/article/329665)
Supplement: Supplementary file 1 [file get_supplementary_file.php]

**supplementary data**

Supplementary Table 1. The etiology of ESRD of the included participants by FFP

|  | Non-frail  (N=98) | Frail  (N=52) | *p-value* |
| --- | --- | --- | --- |
| Glomerulonephritis, n (%) | 31.0 (31.6) | 13.0 (25.0) | 0.441 |
| Diabetic nephropathy, n (%) | 13.0 (13.3) | 14.0 (26.9) |
| Hypertensive renal disease, n (%) | 16.0 (16.3) | 7.0 (13.5) |
| Interstitial nephritis, n (%) | 16.0 (16.3) | 6.0 (11.5) |
| Polycystic kidney, n (%) | 10.0 (10.2) | 5.0 (9.6) |
| Other etiologies, n (%) | 12.0 (12.2) | 7.0 (13.5) |

Supplementary Table 2 The impact of frailty and its components on adverse outcomes (unadjusted)

|  | All-cause mortality | | Emergency visits | | Hospitalization | | Acute cardiovascular events | | Falls | |
| --- | --- | --- | --- | --- | --- | --- | --- | --- | --- | --- |
|  | HR (95% CI) | *P* | IRR (95% CI) | *P* | IRR (95% CI) | *P* | IRR (95% CI) | *P* | IRR (95% CI) | *P* |
| Non-frail | Reference | | Reference | | Reference | | Reference | | Reference | |
| Frail | 5.80 (1.85-18.23) | 0.003* | 2.54 (1.65-3.92) | ＜0.001† | 1.77 (1.04-2.99) | 0.031* | 2.23 (0.79-6.51) | 0.129 | 2.16 (0.85-5.63) | 0.108 |
| Frail component |  |  |  |  |  |  |  |  |  |  |
| Weight loss | 4.29 (1.55-11.83) | 0.005* | 1.66 (0.96-2.96) | 0.074 | 1.15 (0.57-2.25) | 0.672 | 0.93 (0.20-4.09) | 0.914 | 1.37 (0.39-5.09) | 0.622 |
| Slow gait speed | 5.60 (1.78-17.61) | 0.003* | 2.42 (1.57-3.76) | ＜0.001† | 1.97 (1.18-3.32） | 0.009* | 1.49 (0.52-4.42) | 0.457 | 2.88 (1.18-7.32) | 0.023 |
| Weak grip strength | 3.44 (0.97-12.20) | 0.056 | 1.33 (0.84-2.09) | 0.220 | 1.13 (0.67-1.92) | 0.645 | 1.37 (0.47-4.05) | 0.555 | 1.67 (0.66-4.34) | 0.283 |
| Exhaustion | 1.80 (0.65-4.97) | 0.256 | 2.37 (1.54-3.70) | ＜0.001† | 1.63 (0.96-2.76) | 0.066 | 2.98 (1.08-8.60) | 0.035 | 1.55 (0.60-4.09) | 0.371 |
| Low physical activity | 4.20 (1.34-13.19) | 0.014* | 1.85 (1.19-2.90) | 0.006* | 1.97 (1.18-3.31) | 0.009* | 1.86 (0.66-5.39) | 0.237 | 2.91 (1.19-7.39) | 0.021 |

*: *p*<0.05, †: *p*<0.001
